# Supplementary material for: Facile synthesis of SnO2-embedded carbon nanomaterials via glucose-mediated oxidation of Sn particles
Source: Royal Society of Chemistry journal article supplement (doi:10.1039/c0jm04500d), 2011-01-01
Supplement: c0jm04500d.pdf [file c0jm04500d.pdf]

## Facile Synthesis of SnO<sub>2</sub>-Embedded Carbon Nanomaterials via Glucose-mediated Oxidation of Sn Particles

Ming-Yao Cheng,<sup>a</sup> Cheng-Liang Hwang,<sup>b</sup> Chun-Jen Pan,<sup>b</sup> Ju-Hsiang Cheng,<sup>b</sup>  
Yun-Sheng Ye,<sup>b</sup> John F. Rick,<sup>b</sup> and Bing-Joe Hwang<sup>b,c,\*</sup>

<sup>a</sup> Graduate Institute of Engineering, National Taiwan University of Science and Technology, 43, Sec. 4, Keelung Rd., Taipei 106, (Taiwan, ROC)

<sup>b</sup> Chemical Engineering, National Taiwan University of Science and Technology, 43, Sec. 4, Keelung Rd., Taipei 106 (Taiwan, ROC)

<sup>c</sup> National Synchrotron Radiation Research Center (NSRRC), 101 Hsin-Ann Rd., HsinChu 30076 (Taiwan, ROC)

\*E-mail: [bjh@mail.ntust.edu.tw](mailto:bjh@mail.ntust.edu.tw)

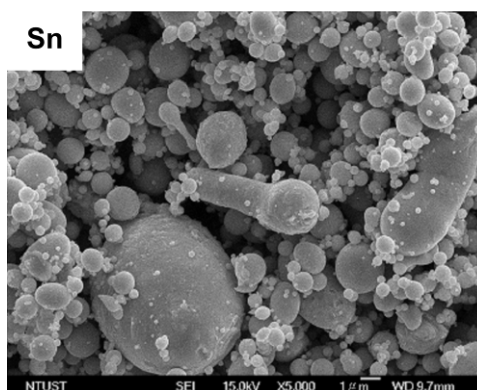

**Figure S1.** SEM image of the commercial Sn particles (scale bar: 1 μm).

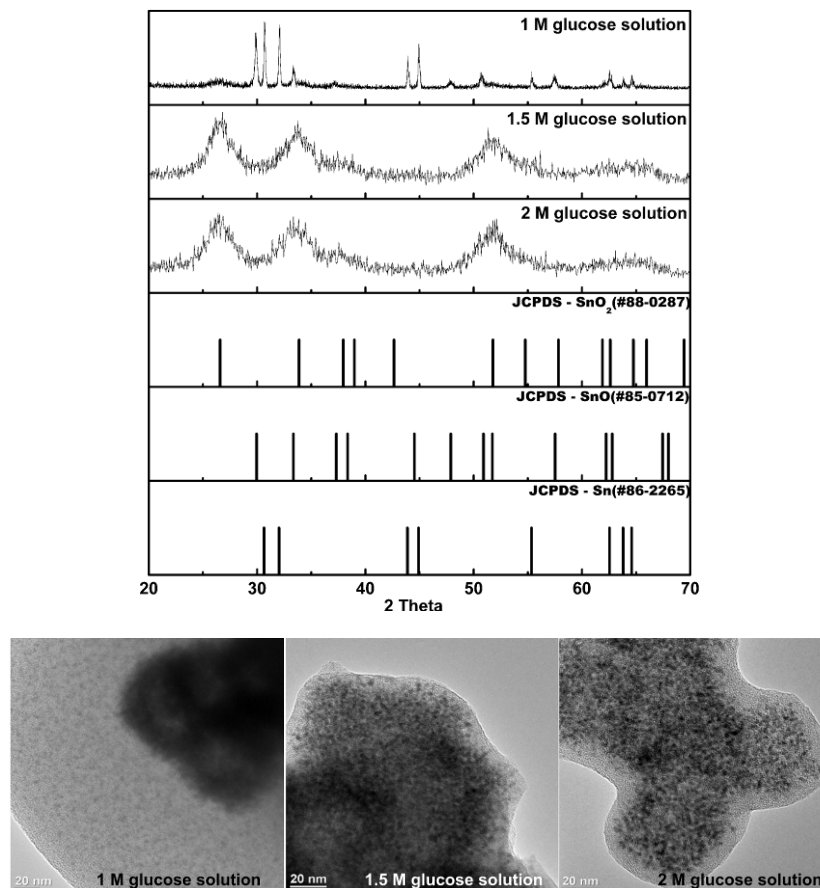

**Figure S2.** XRD patterns and TEM images of 400 °C-heated SnO<sub>2</sub>-embedded carbon spheres.

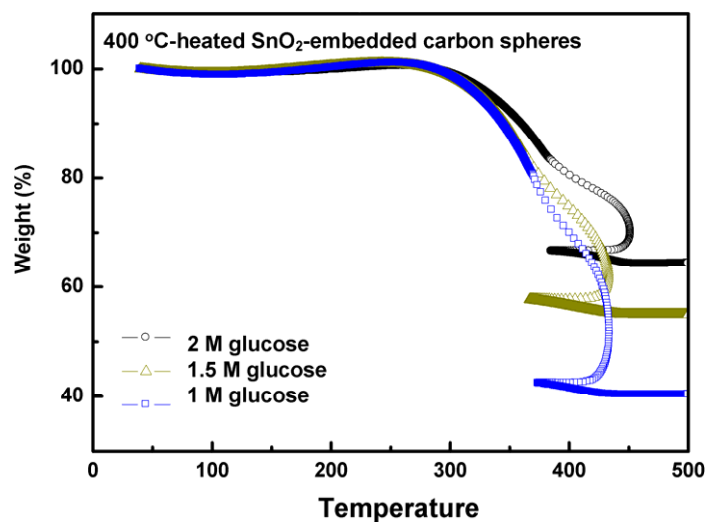

**Figure S3.** TGA data for 400 °C-heated SnO<sub>2</sub>-embedded carbon spheres prepared with various glucose concentrations.

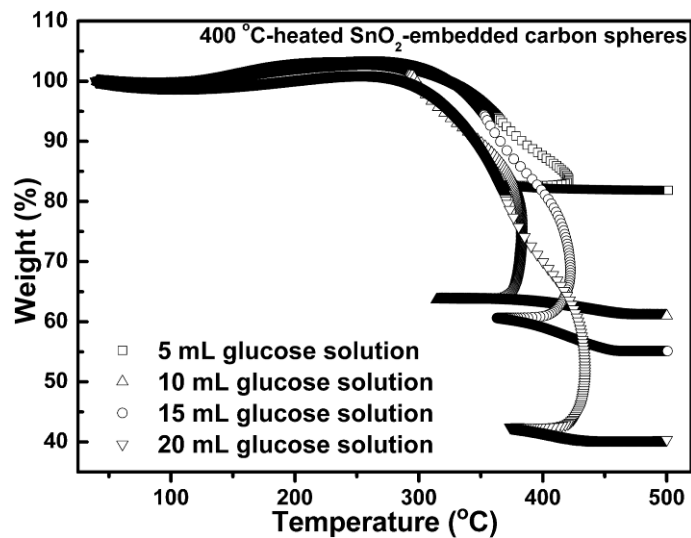

**Figure S4.** TGA data for 400 °C-heated SnO<sub>2</sub>-embedded carbon spheres prepared with various amounts of 2 M glucose solutions.

**Table 1.** Measured pH values of the residual solutions of various glucose concentrations.

| Glucose conc. [M] | pH value |
|-------------------|----------|
| 0.5               | 2.94     |
| 1                 | 2.89     |
| 1.5               | 2.93     |
| 2                 | 2.63     |
| 2 [a]             | 3.12     |

[a] residual solution with pure glucose precursor solution
